# Supplementary material for: Prediction of pathogenicity genes involved in adaptation to a lupin host in the fungal pathogens Botrytis cinerea and Sclerotinia sclerotiorum via comparative genomics
Source: PubMed Central journal article supplement (PMC6525431; doi:10.1186/s12864-019-5774-2), 2019-05-17

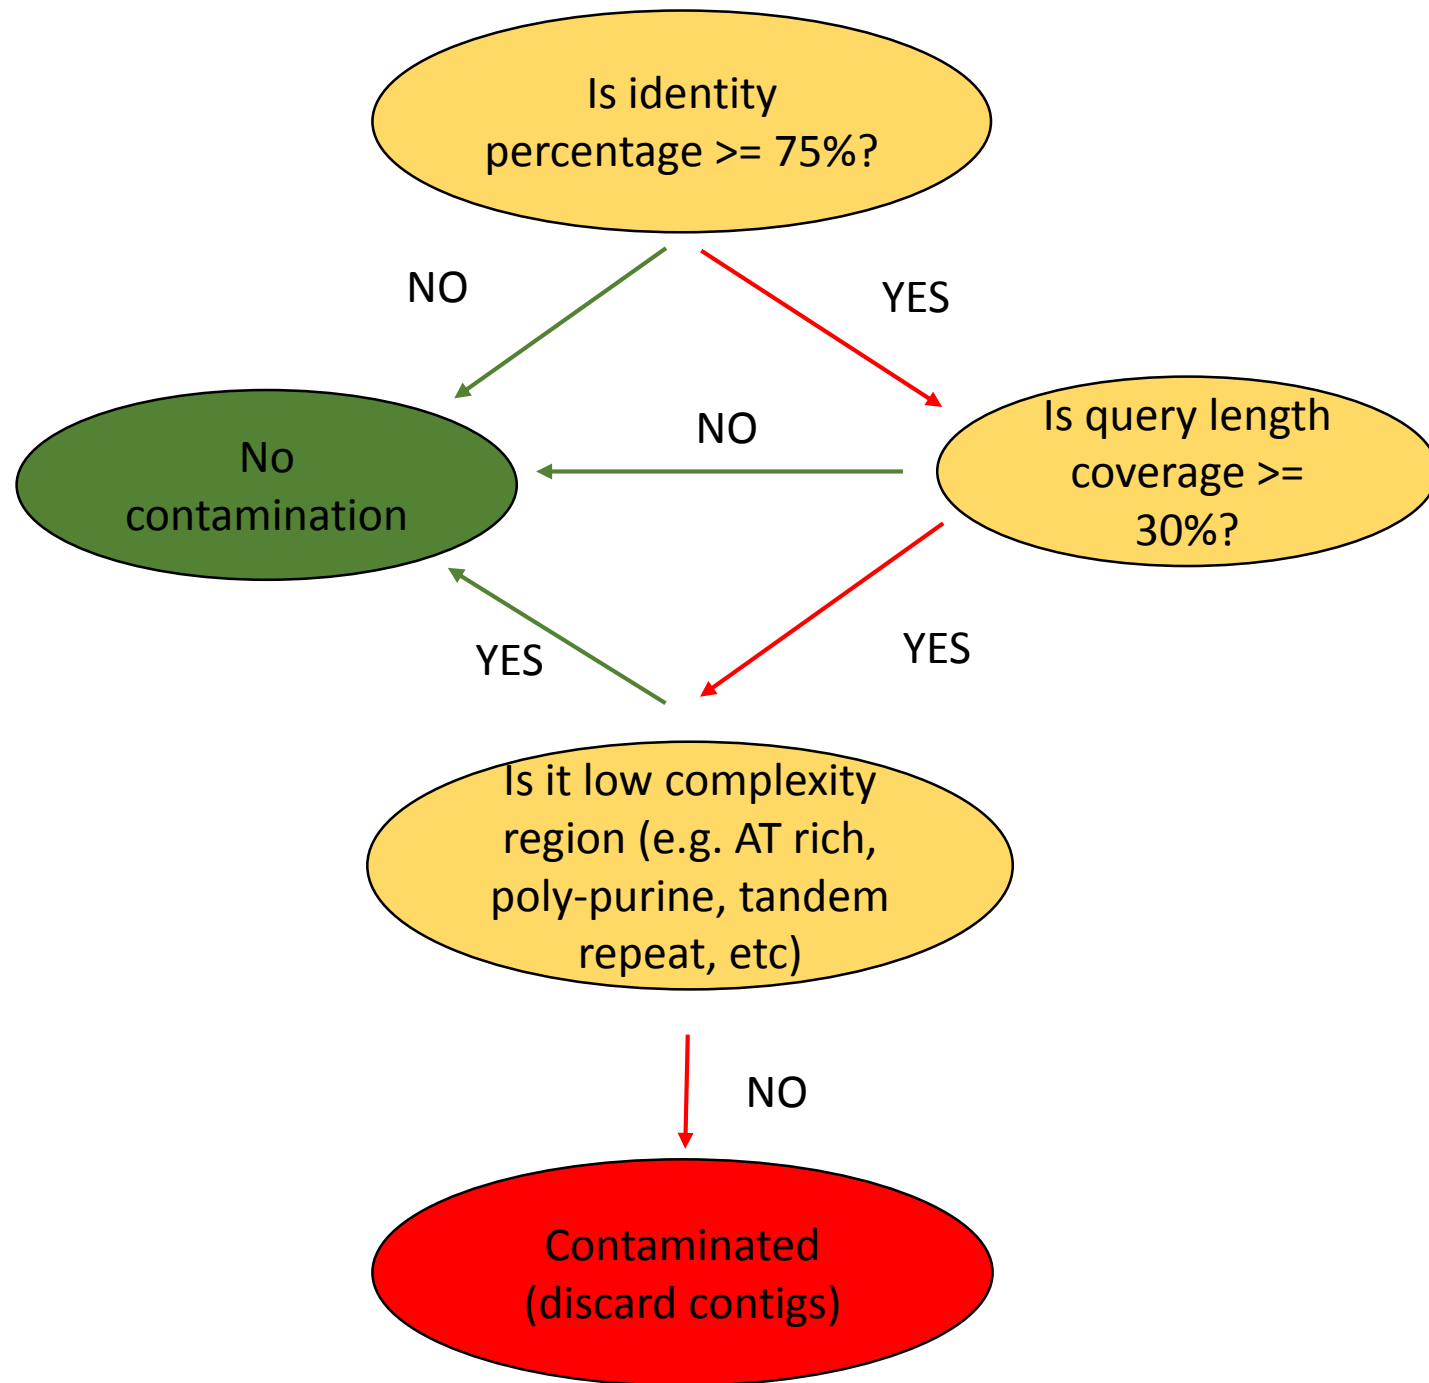

Supplement: 12864_2019_5774_MOESM9_ESM.pdf [file 12864_2019_5774_MOESM9_ESM.pdf]
